# Supplementary material
Source: MDPI journal article supplement (https://www.mdpi.com/2227-7102/11/6/288)
Supplement: s1 [file s1 › education-1122146-supplementary.pdf]

S#3

Subject name: \_\_\_\_\_

Semester of education:

|                          |                          |                          |                          |                          |                          |                          |                          |
|--------------------------|--------------------------|--------------------------|--------------------------|--------------------------|--------------------------|--------------------------|--------------------------|
| <input type="checkbox"/> |
| 1                        | 2                        | 3                        | 4                        | 5                        | 6                        | 7                        | 8                        |

Give a grade (1–5) for:

- the organization of the subject.
- the instructiveness of the subject.
- the link of the subject with your prior knowledge.
- the productivity of the tutorial group.
- the link between the subject and the assessment.
- the quality of tasks/problems/cases.
- the quality of lectures.

*very poor*                      *excellent*  
--                                      ++

|                          |                          |                          |                          |                          |
|--------------------------|--------------------------|--------------------------|--------------------------|--------------------------|
| 1                        | 2                        | 3                        | 4                        | 5                        |
| <input type="checkbox"/> |
| <input type="checkbox"/> |
| <input type="checkbox"/> |
| <input type="checkbox"/> |
| <input type="checkbox"/> |
| <input type="checkbox"/> |
| <input type="checkbox"/> |

8. The subject contents were

|                          |                          |                          |                          |                          |
|--------------------------|--------------------------|--------------------------|--------------------------|--------------------------|
| <i>too easy</i>          | <i>easy</i>              | <i>just right</i>        | <i>difficult</i>         | <i>too difficult</i>     |
| <input type="checkbox"/> |

9. How many hours on average did you spend this subject on self- study per week?

*NB self-study is the time you spend on your study besides the scheduled educational activities*

|                          |                          |                          |                          |                          |                          |                          |                          |
|--------------------------|--------------------------|--------------------------|--------------------------|--------------------------|--------------------------|--------------------------|--------------------------|
| <input type="checkbox"/> |
| $\leq 5$                 | 6-10                     | 11-15                    | 16-20                    | 21-25                    | 26-30                    | 31-35                    | $\geq 36$                |

10. How many hours on average did you spend this subject on your study in total per week (scheduled educational activities and self-study)?

|                          |                          |                          |                          |                          |                          |                          |                          |
|--------------------------|--------------------------|--------------------------|--------------------------|--------------------------|--------------------------|--------------------------|--------------------------|
| <input type="checkbox"/> |
| $\leq 15$                | 16-20                    | 21-25                    | 26-30                    | 31-35                    | 36-40                    | 41-45                    | $\geq 46$                |

11. Tips to improve this subject.

12. The tutor stimulated us to summarize what we had learned in our own words.

1   2   3   4   5  
☐ ☐ ☐ ☐ ☐

13. The tutor stimulated us to create links between the contents of the different parts of the subject matter.

1   2   3   4   5  
☐ ☐ ☐ ☐ ☐

14. The tutor stimulated us to formulate clear learning goals ourselves.

1   2   3   4   5  
☐ ☐ ☐ ☐ ☐

15. The tutor stimulated us to apply what we had learned to the task/other situations/problems.

1   2   3   4   5  
☐ ☐ ☐ ☐ ☐

16. The tutor stimulated us to provide constructive feedback during the tutorial meetings.

1   2   3   4   5  
☐ ☐ ☐ ☐ ☐

17. The tutor stimulated us to regularly evaluate the way we cooperated in the tutorial group.

1   2   3   4   5  
☐ ☐ ☐ ☐ ☐

18. The PBL sessions have improved my understanding of the lectures provided within this module.

1   2   3   4   5  
☐ ☐ ☐ ☐ ☐

19. The PBL sessions have helped my understanding of the theoretical network design process.

1   2   3   4   5  
☐ ☐ ☐ ☐ ☐

20. The PBL sessions have improved my understanding of the practical aspects of network design.

1   2   3   4   5  
☐ ☐ ☐ ☐ ☐

21. Having participated in the PBL sessions, my confidence and ability to undertake a real network design has been enhanced.

1   2   3   4   5  
☐ ☐ ☐ ☐ ☐

22. The PBL sessions were realistic and reflected typical real practical situations.

1   2   3   4   5  
☐ ☐ ☐ ☐ ☐

23. The PBL sessions have helped my ability to work in groups.

1   2   3   4   5  
☐ ☐ ☐ ☐ ☐

24. The PBL sessions were well organized and effective.

1   2   3   4   5  
☐ ☐ ☐ ☐ ☐

25. The PBL sessions should be kept as part of this module.

1 2 3 4 5

☐ ☐ ☐ ☐ ☐

26. Tips to improve this subject for the tutor (be sensitive and supportive, please).

## PBL\_second staff

\* Required

6/27/2020

PBL\_second staff

Email address \*

1.

2. What is your gender? \*

*Mark only one oval.*

☐ Male

☐ Female

3. What is your age? \*

\_\_\_\_\_

4. How long have you been teaching? \*

\_\_\_\_\_

5. What is your field of expertise? \*

\_\_\_\_\_

6. What is the highest level of education that you have? \*

[https://docs.google.com/forms/d/1ezC-zuZgGHV8eUQQxhm\\_rtFilDJhrpTPQPawdnLArYs/edit](https://docs.google.com/forms/d/1ezC-zuZgGHV8eUQQxhm_rtFilDJhrpTPQPawdnLArYs/edit)  
[https://docs.google.com/forms/d/1ezC-zuZgGHV8eUQQxhm\\_rtFilDJhrpTPQPawdnLArYs/edit](https://docs.google.com/forms/d/1ezC-zuZgGHV8eUQQxhm_rtFilDJhrpTPQPawdnLArYs/edit)

A#4

.

7. In which field? \*

8. PBL as pedagogical method

6/27/2020

PBL\_second staff

*Check all that apply.*

|                                                                                          | Totally disagree         | Disagree                 | I do not know            | Agree                    | Totally Agree            |
|------------------------------------------------------------------------------------------|--------------------------|--------------------------|--------------------------|--------------------------|--------------------------|
| PBL helps the student acquire relevant knowledge for their profession                    | <input type="checkbox"/> |
| PBL contributes to the independence of students                                          | <input type="checkbox"/> |
| Group tutorials help students to evaluate their own knowledge                            | <input type="checkbox"/> |
| Group tutorials enrich student learning (communication and reflection)                   | <input type="checkbox"/> |
| Group tutorials help students share experiences with each other                          | <input type="checkbox"/> |
| In group tutorials the students have time to sort out issues that are hard to understand | <input type="checkbox"/> |
| Group discussions help problem processing                                                | <input type="checkbox"/> |
| Work in tutorial group helps students to reach an optimal depth of knowledge             | <input type="checkbox"/> |
| In my opinion, PBL is a great tool for student learning                                  | <input type="checkbox"/> |

[https://docs.google.com/forms/d/1ezC-zuZgGHV8eUQQxhm\\_rtFiLDJhrpTPQPawdnLArYs/edit](https://docs.google.com/forms/d/1ezC-zuZgGHV8eUQQxhm_rtFiLDJhrpTPQPawdnLArYs/edit)

9. Supervising problem processing in tutorial groups \*

*Check all that apply.*

| 6/27/2020                                                                     | Totally disagree         | PBL_second staff Disagree | I do not know            | Agree                    | Totally Agree            |
|-------------------------------------------------------------------------------|--------------------------|---------------------------|--------------------------|--------------------------|--------------------------|
| I support student learning by helping them to achieve the learning goals      | <input type="checkbox"/> | <input type="checkbox"/>  | <input type="checkbox"/> | <input type="checkbox"/> | <input type="checkbox"/> |
| I help the students to fulfill the aims of the course                         | <input type="checkbox"/> | <input type="checkbox"/>  | <input type="checkbox"/> | <input type="checkbox"/> | <input type="checkbox"/> |
| I function as a resource person in the group                                  | <input type="checkbox"/> | <input type="checkbox"/>  | <input type="checkbox"/> | <input type="checkbox"/> | <input type="checkbox"/> |
| I participate in creating a positive work environment for the group           | <input type="checkbox"/> | <input type="checkbox"/>  | <input type="checkbox"/> | <input type="checkbox"/> | <input type="checkbox"/> |
| I encourage student learning by stimulating questions                         | <input type="checkbox"/> | <input type="checkbox"/>  | <input type="checkbox"/> | <input type="checkbox"/> | <input type="checkbox"/> |
| I stress the importance of constant student reflection                        | <input type="checkbox"/> | <input type="checkbox"/>  | <input type="checkbox"/> | <input type="checkbox"/> | <input type="checkbox"/> |
| I see to it that all students in the group have their say                     | <input type="checkbox"/> | <input type="checkbox"/>  | <input type="checkbox"/> | <input type="checkbox"/> | <input type="checkbox"/> |
| I am sensitive to the wishes of the students regarding their need for support | <input type="checkbox"/> | <input type="checkbox"/>  | <input type="checkbox"/> | <input type="checkbox"/> | <input type="checkbox"/> |
| I am interested in being a tutor                                              | <input type="checkbox"/> | <input type="checkbox"/>  | <input type="checkbox"/> | <input type="checkbox"/> | <input type="checkbox"/> |

[https://docs.google.com/forms/d/1ezC-zuZgGHV8eUQQxhm\\_rtFiIDJhrpTPQPawdnLArYs/edit](https://docs.google.com/forms/d/1ezC-zuZgGHV8eUQQxhm_rtFiIDJhrpTPQPawdnLArYs/edit)

# 10. Potential barriers to student learning in PBL <sup>\*</sup>

Check all that apply.

|                                                                              |                          |                          |                          |                          |                          |
|------------------------------------------------------------------------------|--------------------------|--------------------------|--------------------------|--------------------------|--------------------------|
| 6/27/2020                                                                    | PBL_second staff         |                          |                          |                          |                          |
|                                                                              | Totally disagree         | Disagree                 | I do not know            | Agree                    | Totally Agree            |
| I have relevant teaching qualifications in PBL                               | <input type="checkbox"/> |
| It is difficult for students to know if they have learned enough             | <input type="checkbox"/> |
| Discussions in the tutorial group are slow moving                            | <input type="checkbox"/> |
| Work in the tutorial group has a test function and is stressful for students | <input type="checkbox"/> |
| Time for discussion in the tutorial group is too short                       | <input type="checkbox"/> |
| The group size is just right from a tutorial point of view                   | <input type="checkbox"/> |
| Discussion in the tutorial group creates uncertainty among students          | <input type="checkbox"/> |
| PBL evokes feelings of inadequacy in students                                | <input type="checkbox"/> |

[https://docs.google.com/forms/d/1ezC-zuZgGHV8eUQQxhm\\_rtFiIDJhrpTPQPawdnLArYs/edit](https://docs.google.com/forms/d/1ezC-zuZgGHV8eUQQxhm_rtFiIDJhrpTPQPawdnLArYs/edit)

The tutor's role in the tutorial group \*

11.

*Check all that apply.*

|                                                                           | Totally disagree         | Disagree                 | I do not know            | Agree                    | Totally Agree            |
|---------------------------------------------------------------------------|--------------------------|--------------------------|--------------------------|--------------------------|--------------------------|
| Students need my feedback to support their learning                       | <input type="checkbox"/> |
| I tend to explain and teach the tutorial group                            | <input type="checkbox"/> |
| My role as tutor is usually passive in the tutorial group                 | <input type="checkbox"/> |
| The students find it difficult to judge the relevance of literature found | <input type="checkbox"/> |

12. Relationship between theory and practice in PBL \*

*Check all that apply.*

|                                                                | Totally disagree         | Disagree                 | I do not know            | Agree                    | Totally Agree            |
|----------------------------------------------------------------|--------------------------|--------------------------|--------------------------|--------------------------|--------------------------|
| PBL motivates me to continuously update my skills as a teacher | <input type="checkbox"/> |
| PBL is based on true-life cases which creates involvement      | <input type="checkbox"/> |
| PBL creates a balance between theory and practice in education | <input type="checkbox"/> |
| I was selected by my department                                | <input type="checkbox"/> |

### 13. Assertions \*

Check all that apply.

| 6/27/2020                                                           | Totally<br>disagree      | PBL_second<br>Disagree   | staff<br>I do not<br>know | Agree                    | Totally<br>Agree         |
|---------------------------------------------------------------------|--------------------------|--------------------------|---------------------------|--------------------------|--------------------------|
| The students' motivation level affects work in the tutorial group   | <input type="checkbox"/> | <input type="checkbox"/> | <input type="checkbox"/>  | <input type="checkbox"/> | <input type="checkbox"/> |
| PBL stimulates student learning                                     | <input type="checkbox"/> | <input type="checkbox"/> | <input type="checkbox"/>  | <input type="checkbox"/> | <input type="checkbox"/> |
| Tutorial groups help students to share experiences with each other  | <input type="checkbox"/> | <input type="checkbox"/> | <input type="checkbox"/>  | <input type="checkbox"/> | <input type="checkbox"/> |
| I try to create a positive working atmosphere in the tutorial group | <input type="checkbox"/> | <input type="checkbox"/> | <input type="checkbox"/>  | <input type="checkbox"/> | <input type="checkbox"/> |
| Group discussion facilitates problem processing                     | <input type="checkbox"/> | <input type="checkbox"/> | <input type="checkbox"/>  | <input type="checkbox"/> | <input type="checkbox"/> |
| I intervene and redirect discussion if it takes a wrong turn        | <input type="checkbox"/> | <input type="checkbox"/> | <input type="checkbox"/>  | <input type="checkbox"/> | <input type="checkbox"/> |
| Group meetings enrich student learning through communication        | <input type="checkbox"/> | <input type="checkbox"/> | <input type="checkbox"/>  | <input type="checkbox"/> | <input type="checkbox"/> |
| I support learning by helping students perform the learning tasks   | <input type="checkbox"/> | <input type="checkbox"/> | <input type="checkbox"/>  | <input type="checkbox"/> | <input type="checkbox"/> |
| I see to it that all students have their say in the group           | <input type="checkbox"/> | <input type="checkbox"/> | <input type="checkbox"/>  | <input type="checkbox"/> | <input type="checkbox"/> |
| Tutorial group size is right from a tutorial point of view          | <input type="checkbox"/> | <input type="checkbox"/> | <input type="checkbox"/>  | <input type="checkbox"/> | <input type="checkbox"/> |
| I help the students to achieve the objectives of the course         | <input type="checkbox"/> | <input type="checkbox"/> | <input type="checkbox"/>  | <input type="checkbox"/> | <input type="checkbox"/> |
| I am sensitive to the wishes of students when they need support     | <input type="checkbox"/> | <input type="checkbox"/> | <input type="checkbox"/>  | <input type="checkbox"/> | <input type="checkbox"/> |

#### 14. Items/ Opinions \*

Check all that apply.

6/27/2020

PBL\_second staff

|                                                                     | Totally disagree         | Disagree                 | I do not know            | Agree                    | Totally Agree            |
|---------------------------------------------------------------------|--------------------------|--------------------------|--------------------------|--------------------------|--------------------------|
| I often have problems with group dynamics in the tutorial group     | <input type="checkbox"/> |
| Work in the group has a test function and is stressful for students | <input type="checkbox"/> |
| Time for tutorial group work is too short                           | <input type="checkbox"/> |
| I tend to explain and teach the group                               | <input type="checkbox"/> |

[https://docs.google.com/forms/d/1ezC-zuZgGHV8eUQQxhm\\_rtFiIDJhrpTPQPawdnLArYs/edit](https://docs.google.com/forms/d/1ezC-zuZgGHV8eUQQxhm_rtFiIDJhrpTPQPawdnLArYs/edit)

## 15. Assertions \*

*Check all that apply.*

|                                                                          | Totally disagree         | Disagree                 | I do not know            | Agree                    | Totally Agree            |
|--------------------------------------------------------------------------|--------------------------|--------------------------|--------------------------|--------------------------|--------------------------|
| I prefer PBL instead of classical teaching methods.                      | <input type="checkbox"/> |
| There are a lot of advantages of PBL in compare with classical teaching  | <input type="checkbox"/> |
| I prefer to use PBL in my teaching in the future as well                 | <input type="checkbox"/> |
| I was confident in applying PBL approach                                 | <input type="checkbox"/> |
| I was good prepared for teaching using the PBL                           | <input type="checkbox"/> |
| I need some additional trainings for better applying the PBL approach    | <input type="checkbox"/> |
| It was easy to encourage students to apply PBL                           | <input type="checkbox"/> |
| I need to familiarize with the specific materials for teaching using PBL | <input type="checkbox"/> |

## 16. What additional problems you had?

---

This content is neither created nor endorsed by Google.

Google Forms
